# Supplementary material for: De Novo Detrusor Underactivity and Other Urodynamic Findings after Radical Prostatectomy: A Systematic Review
Source: MDPI journal article supplement (doi:10.3390/medicina58030381), 2022-03-04
Supplement: s1 [file s1]

## Supplementary Materials

**Table S1.** Searching strategies for electronic databases.

| Database         | Query String                                                                                                                                                                                                                                                                                                                  |
|------------------|-------------------------------------------------------------------------------------------------------------------------------------------------------------------------------------------------------------------------------------------------------------------------------------------------------------------------------|
| PubMed           | (urodynami*[Title/Abstract] OR “detrusor underactivity”[Title/Abstract] OR “Impaired detrusor contractility”[Title/Abstract] OR “detrusor hypocontractility”[Title/Abstract] OR urodynamics[MeSH Terms] OR “pressure-flow”[Title/Abstract]) AND (radical[Title/Abstract] AND prostatectomy [Title/Abstract])                  |
| Cochrane Library | #1 (urodynami*):ti,ab,kw OR (“detrusor underactivity”):ti,ab,kw OR (“impaired detrusor contractility”):ti,ab,kw OR (“detrusor hypocontractility”):ti,ab,kw OR (“pressure-flow”):ti,ab,kw<br>#2 MeSH descriptor: [Urodynamics] explode all trees<br>#3 (radical):ti,ab,kw AND (prostatectomy):ti,ab,kw<br>#4 (#1 or #2) and #3 |
| Web of Science   | (TS = (urodynami*) OR TS = (“detrusor underactivity”) OR TS = (“Impaired detrusor contractility”) OR TS = (“detrusor hypocontractility”) OR TS = (“pressure-flow”)) AND (TS = (radical) AND TS = (prostatectomy))                                                                                                             |
| Scopus           | (TITLE-ABS-KEY (urodynami*) OR TITLE-ABS-KEY (“detrusor underactivity”) OR TITLE-ABS-KEY (“Impaired detrusor contractility”) OR TITLE-ABS-KEY (“detrusor hypocontractility”) OR TITLE-ABS-KEY (“pressure-flow”)) AND (TITLE-ABS-KEY ( radical) AND TITLE-ABS-KEY (prostatectomy))                                             |
| Embase           | ((urodynami*):ti,ab,kw OR (“detrusor underactivity”):ti,ab,kw OR (“impaired detrusor contractility”):ti,ab,kw OR (“detrusor hypocontractility”):ti,ab,kw OR (“pressure-flow”):ti,ab,kw) AND ((radical):ti,ab,kw ,AND (prostatectomy):ti,ab,kw)                                                                                |

**Table S2.** Baseline characteristics of patients without follow-up.

| Year | Author    | N  | Reason for Lack of Postoperative UDS | Preoperative Urodynamic Findings |     |    |           |
|------|-----------|----|--------------------------------------|----------------------------------|-----|----|-----------|
|      |           |    |                                      | IBC                              | BOO | DO | DU        |
| 1984 | Rudy      | 4  | death: 1; resignation: 3             | -                                | -   | -  | -         |
| 2000 | John      | 5  | vesicourethral anastomosis stricture | -                                | -   | -  | -         |
| 2004 | Natsume   | 4  | -                                    | -                                | -   | -  | -         |
| 2013 | Mucciardi | 12 | vesicourethral anastomosis stricture | 0%                               | -   | 0% | 12 (100%) |
| 2018 | Huang     | 17 | -                                    | -                                | -   | -  | -         |
